# Supplementary material for: Dynamic contrast-enhanced MRI as a predictor of programmed death ligand-1 expression in patients with oral squamous cell carcinoma
Source: PubMed Central journal article supplement — Oncol Lett. 2021 Sep 13;22(5):778. doi: 10.3892/ol.2021.13039 (PMC8456498; doi:10.3892/ol.2021.13039), 2021-09-13
Supplement: Supplementary_Data.pdf [file Supplementary_Data.pdf]

Figure S1. VEGF expression in oral squamous cell carcinoma. (A) Low VEGF expression; (B) High VEGF expression. Scale bar=100  $\mu$ m. VEGF, vascular endothelial growth factor.

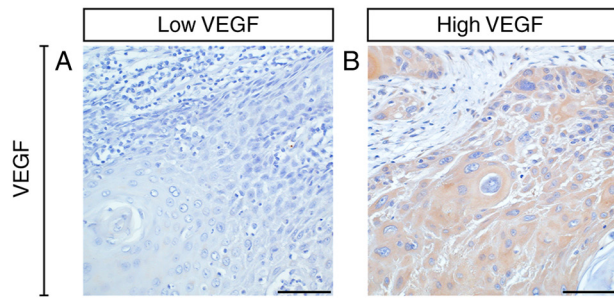

Table SI. Association between PD-L1 expression and tumor recurrence.

| Variables           | PD-L1 expression         |                             |                              | P-value |
|---------------------|--------------------------|-----------------------------|------------------------------|---------|
|                     | PD-L1 <sup>-</sup> (n=7) | PD-L1 <sup>+low</sup> (n=5) | PD-L1 <sup>+high</sup> (n=5) |         |
| Tumor recurrence    |                          |                             |                              | 0.165   |
| No                  |                          |                             |                              |         |
| N=9                 | 4                        | 4                           | 1                            |         |
| Tumor recurrence, % | 44.4                     | 44.4                        | 11.1                         |         |
| PD-L1 expression, % | 57.1                     | 80.0                        | 20.0                         |         |
| Yes                 |                          |                             |                              |         |
| N=8                 | 3                        | 1                           | 4                            |         |
| Tumor recurrence, % | 37.5                     | 12.5                        | 50.0                         |         |
| PD-L1 expression, % | 42.9                     | 20.0                        | 80.0                         |         |

P<0.05 via Fisher's exact test was considered statistically significant. PD-L1, programmed death ligand-1; PD-L1<sup>-</sup>, negative PD-L1; PD-L1<sup>+low</sup>, low-positive PD-L1; PD-L1<sup>+high</sup>, high-positive PD-L1.
